# Supplementary figures and images for: Forceless spontaneous delamination of high-aspect ratio fluorohectorite into monolayer nanosheets in chloroform
Source: Royal Society of Chemistry journal article supplement (doi:10.1039/d4cc00475b), 2024-01-01

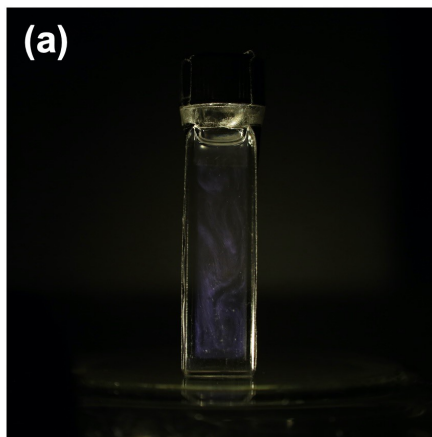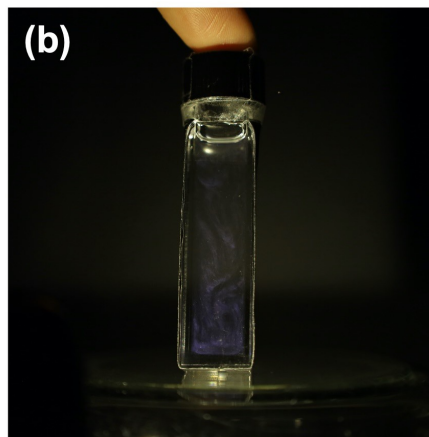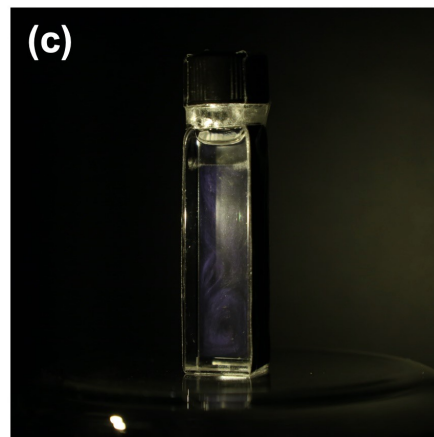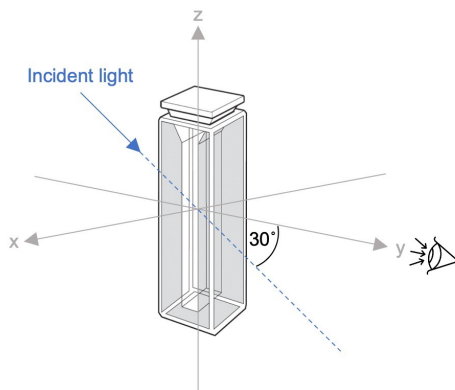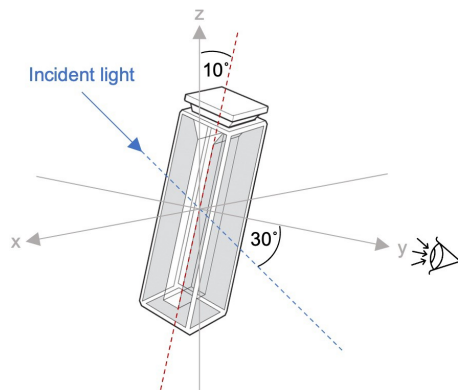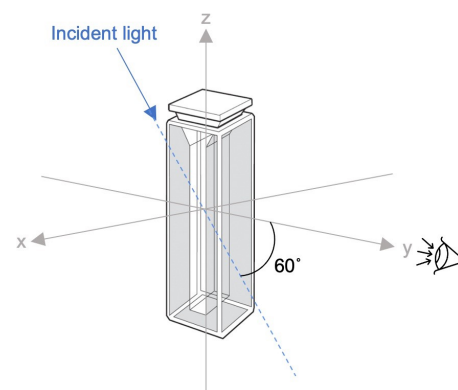

Supplement: d4cc00475b3.pdf [file d4cc00475b3.pdf]

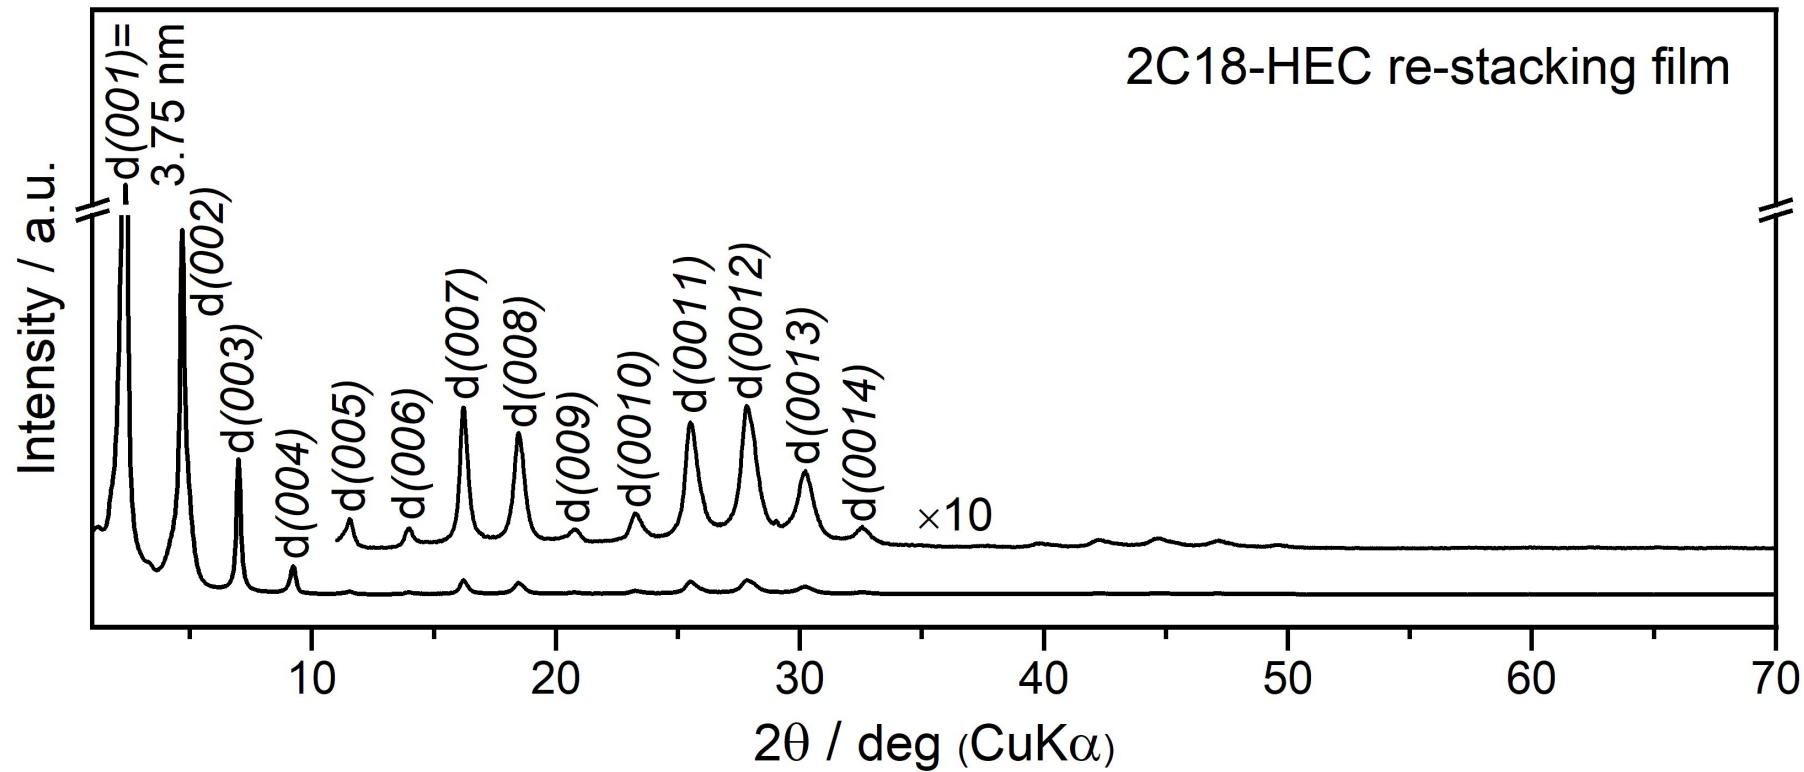

Supplement: d4cc00475b4.pdf [file d4cc00475b4.pdf]
